# Supplementary material for: Inverse Comorbidity between Down Syndrome and Solid Tumors: Insights from In Silico Analyses of Down Syndrome Critical Region Genes
Source: MDPI journal article supplement (doi:10.3390/genes14040800), 2023-03-26
Supplement: s1 [file s1]

SUPPLEMENTARY DATA

Fosu *et al.* Inverse comorbidity between Down syndrome and solid tumors: Insights from *in silico* analyses of Down syndrome critical region genes.

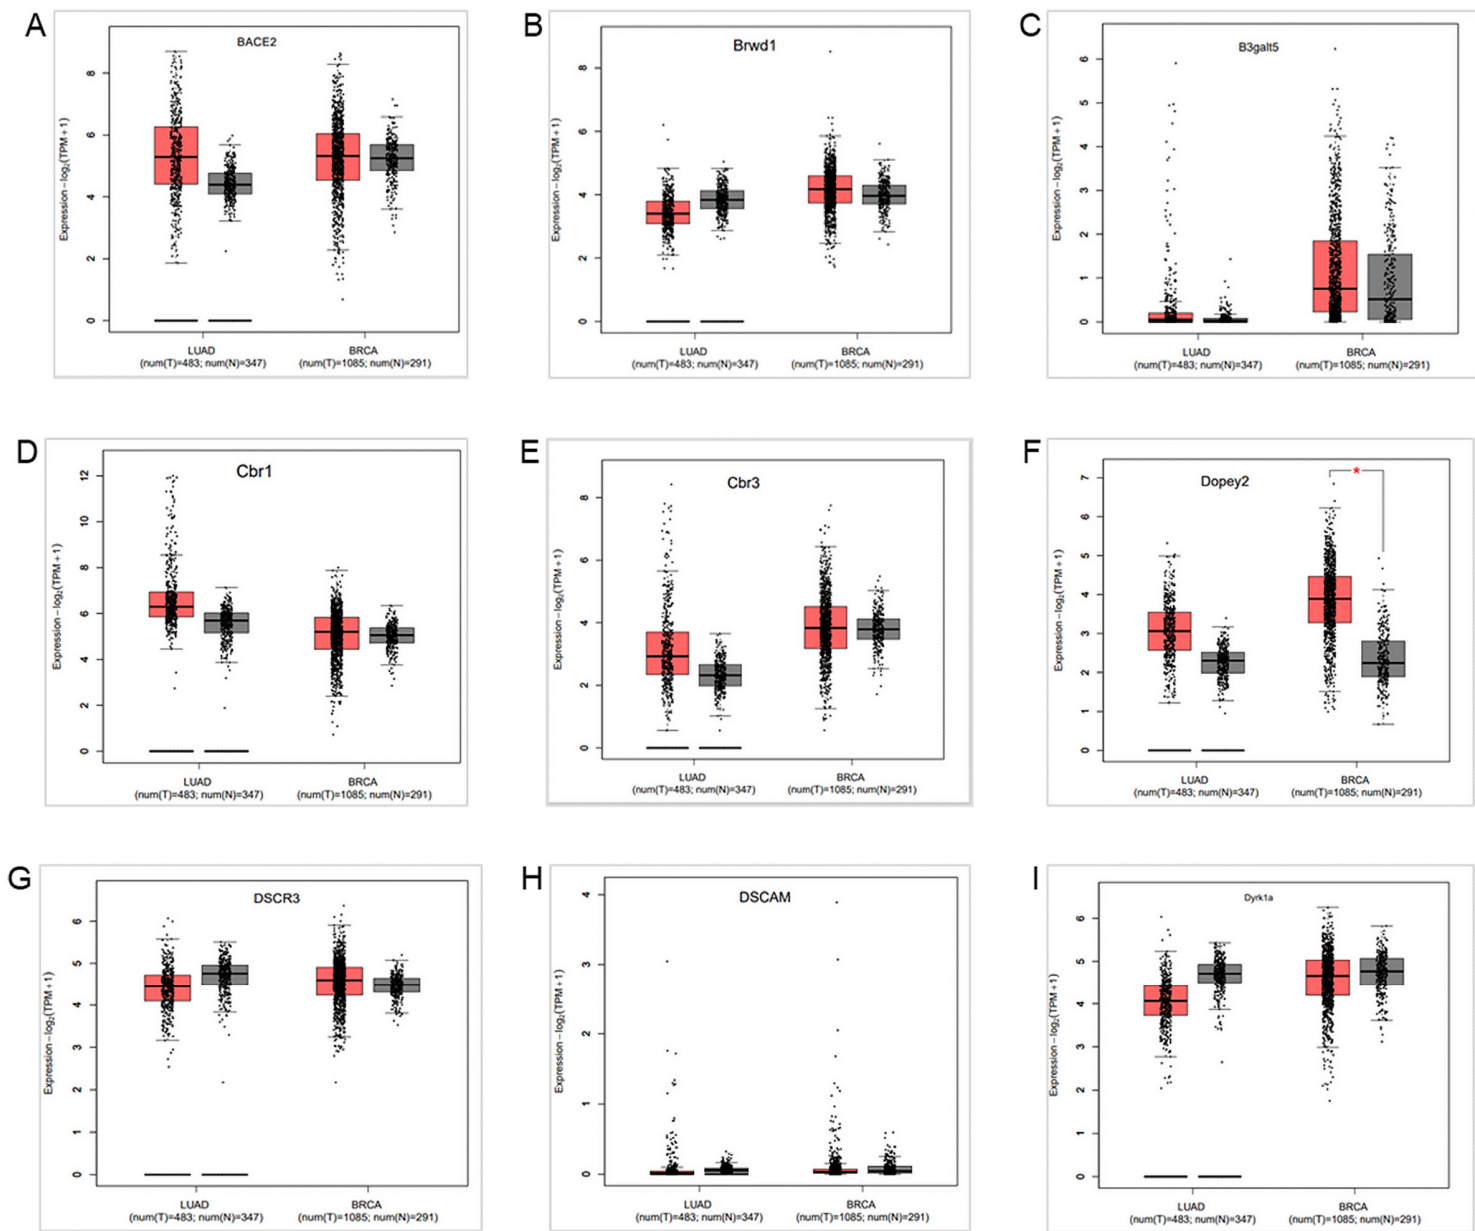

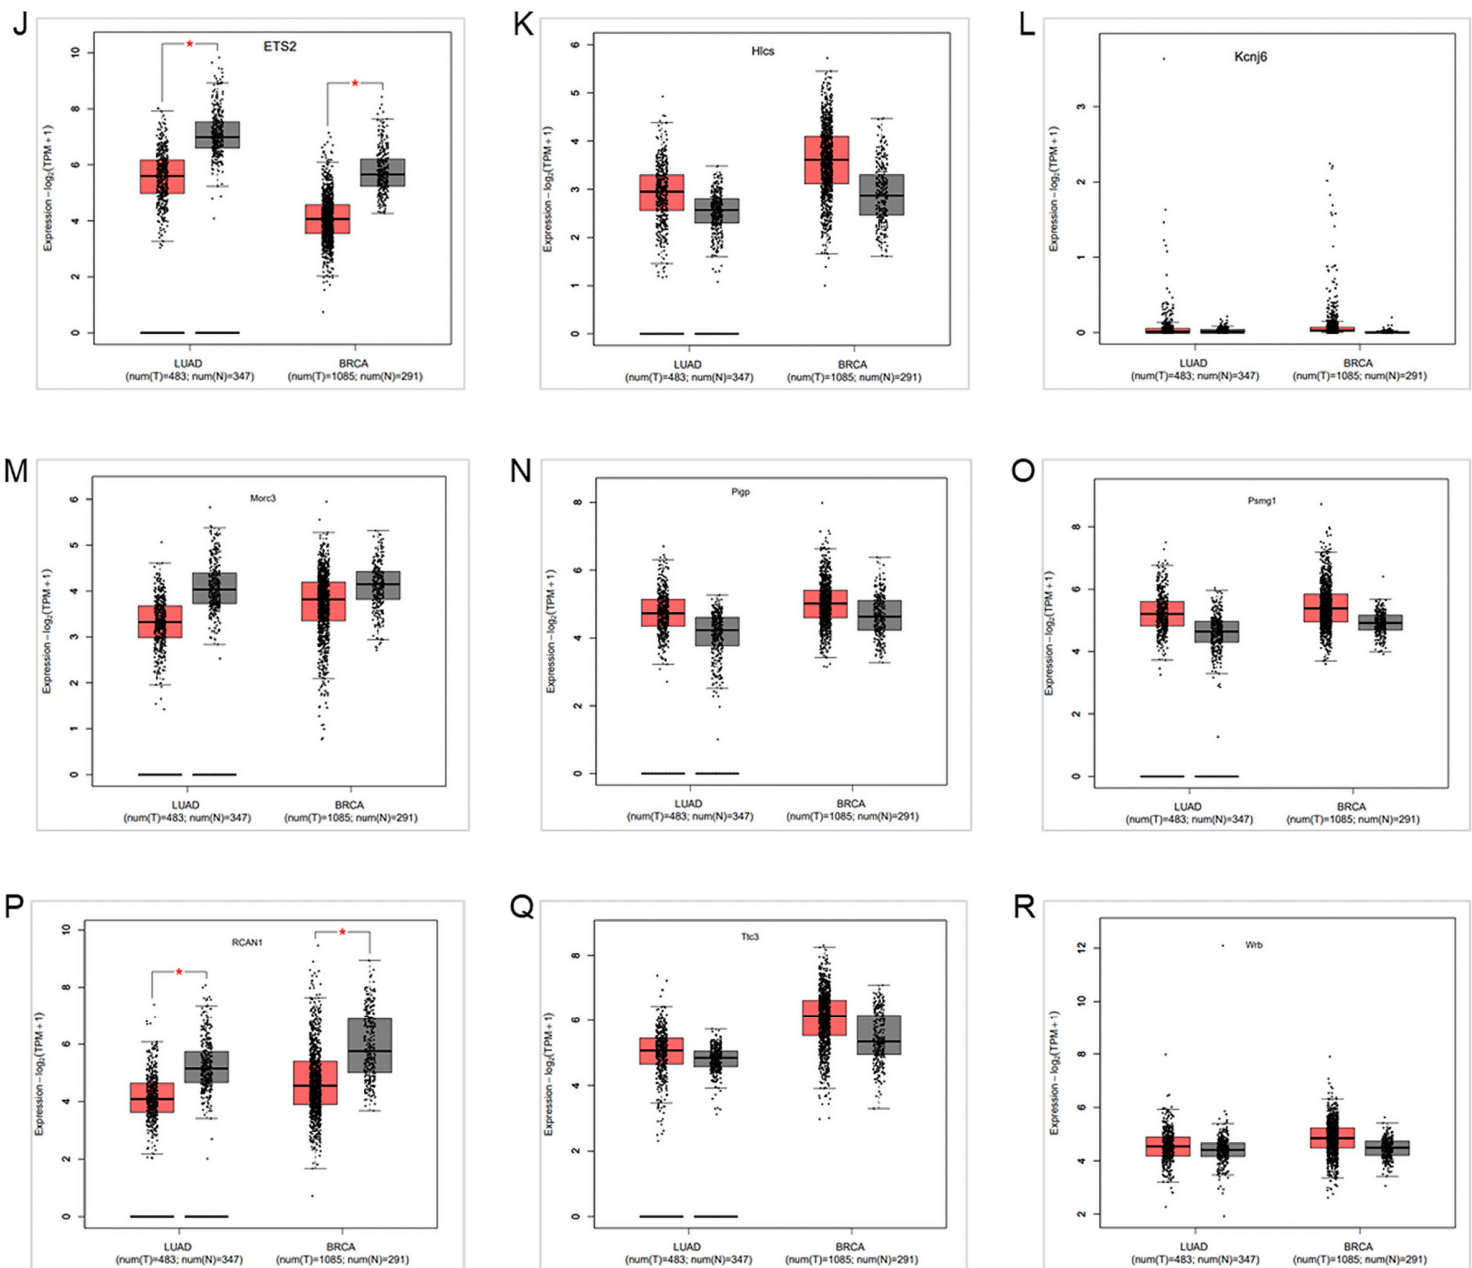

**Supplemental Figure S1.** Differential expression of upregulated DSCR genes in breast and lung cancers. Boxplots represent mRNA expression of (A) Bace2, (B) Brwd1, (C) B3galt5, (D) Cbr1, (E) Cbr3, (F) Dopey2, (G) Dscam, (H) Dscr3, (I) Dyrk1a, (J) Ets2, (K) Hlcs, (L) Kcnj6, (M) Morc3, (N) Pigp, (O) Psmg1, (P) Rcan1, (Q) Ttc3 and (R) Wrb in breast and lung cancers. Red box: tumor samples, black box: normal samples, BRCA: breast invasive carcinoma, LUAD: lung adenocarcinoma, T: tumor, N: normal,  $P$  value  $< 0.01$ ,  $|\text{Log2FC}| < 1$ .

**Supplemental Table S1.** Survival of breast cancer patients based on expression of DSCR genes

| Gene Symbol    | Survival Mean                     |                                    | <i>P</i> value |
|----------------|-----------------------------------|------------------------------------|----------------|
|                | Low expression cohort<br>(months) | High expression cohort<br>(months) |                |
| <i>Bace2</i>   | 148.53                            | 122.3                              | 0.0194         |
| <i>Brwd1</i>   | 98.83                             | 79.1                               | 0.0633         |
| <i>B3galt5</i> | 129.1                             | 131.37                             | 0.0143         |
| <i>Cbr1</i>    | 53.16                             | 46                                 | 0.092          |
| <i>Cbr3</i>    | 53.36                             | 46                                 | 0.2473         |
| <i>Dopey2</i>  | 228.85                            | 191.21                             | 0.6511         |
| <i>Dscam</i>   | 36.9                              | 40.3                               | 0.1542         |
| <i>Dscr3</i>   | 53.16                             | 45.44                              | 0.1238         |
| <i>Dyrk1a</i>  | 131.97                            | 122.3                              | 0.274          |
| <i>Ets2</i>    | 44.5                              | 58.15                              | 0.0008         |
| <i>Hlcs</i>    | 215.2                             | 115.37                             | 0.0024         |
| <i>Kcnj6</i>   | 142.23                            | 115.4                              | 0.1028         |
| <i>Morc3</i>   | 248.5                             | 116.4                              | 0.0135         |
| <i>Pigp</i>    | 219.77                            | 115.37                             | 0.0044         |
| <i>Psmg1</i>   | 76                                | 36.99                              | 1E-15          |
| <i>Rcan1</i>   | 43.44                             | 58                                 | 0.0017         |
| <i>Ttc3</i>    | 215.2                             | 113.93                             | 0.0415         |
| <i>Wrb</i>     | 142.23                            | 113.93                             | 0.0028         |

**Supplemental Table S2.** Survival of lung cancer patients based on expression of DSCR genes

| Gene Symbol    | Survival Mean                     |                                    | <i>P</i> value |
|----------------|-----------------------------------|------------------------------------|----------------|
|                | Low expression cohort<br>(months) | High expression cohort<br>(months) |                |
| <i>Bace2</i>   | 67                                | 72.33                              | 0.1963         |
| <i>Brwd1</i>   | 47.37                             | 50.03                              | 0.1547         |
| <i>B3galt5</i> | 54.4                              | 40.97                              | 0.0165         |
| <i>Cbr1</i>    | 53.33                             | 45.23                              | 0.2826         |
| <i>Cbr3</i>    | 50.03                             | 43.1                               | 0.091          |
| <i>Dopey2</i>  | 77.77                             | 62.2                               | 0.1069         |
| <i>Dscam</i>   | 76                                | 62.3                               | 0.0354         |
| <i>Dcr3</i>    | 80                                | 62.3                               | 0.0007         |
| <i>Dyrk1a</i>  | 228.85                            | 216.66                             | 0.1444         |

|              |       |       |          |
|--------------|-------|-------|----------|
| <i>Ets2</i>  | 52    | 81    | 0.00001  |
| <i>Hlcs</i>  | 54.07 | 42.93 | 0.3697   |
| <i>Kcnj6</i> | 50.93 | 38.23 | 0.0809   |
| <i>Morc3</i> | 42.27 | 57.5  | 0.0611   |
| <i>Pigp</i>  | 50.03 | 47.37 | 0.2551   |
| <i>Psmg1</i> | 53.33 | 45.23 | 0.2217   |
| <i>Rcan1</i> | 54.3  | 79    | 0.000099 |
| <i>Ttc3</i>  | 42.27 | 57.5  | 0.1386   |
| <i>Wrb</i>   | 33.3  | 50.53 | 0.0225   |
